# Supplementary material for: Assessing the Extent of Flood-Prone Areas in a South-American Megacity Using Different High Resolution DTMs
Source: MDPI journal article supplement (doi:10.3390/w15061127), 2023-03-15
Supplement: s1 [file s1]

Archive with 1 entries (1 files):
- water-2232026-supplementary.pdf
