# Supplementary material for: Assessing the Extent of Flood-Prone Areas in a South-American Megacity Using Different High Resolution DTMs
Source: MDPI journal article supplement (doi:10.3390/w15061127), 2023-03-15
Supplement: s1 [file s1 › water-2232026-supplementary.pdf]

# 1. Supplementary Figures

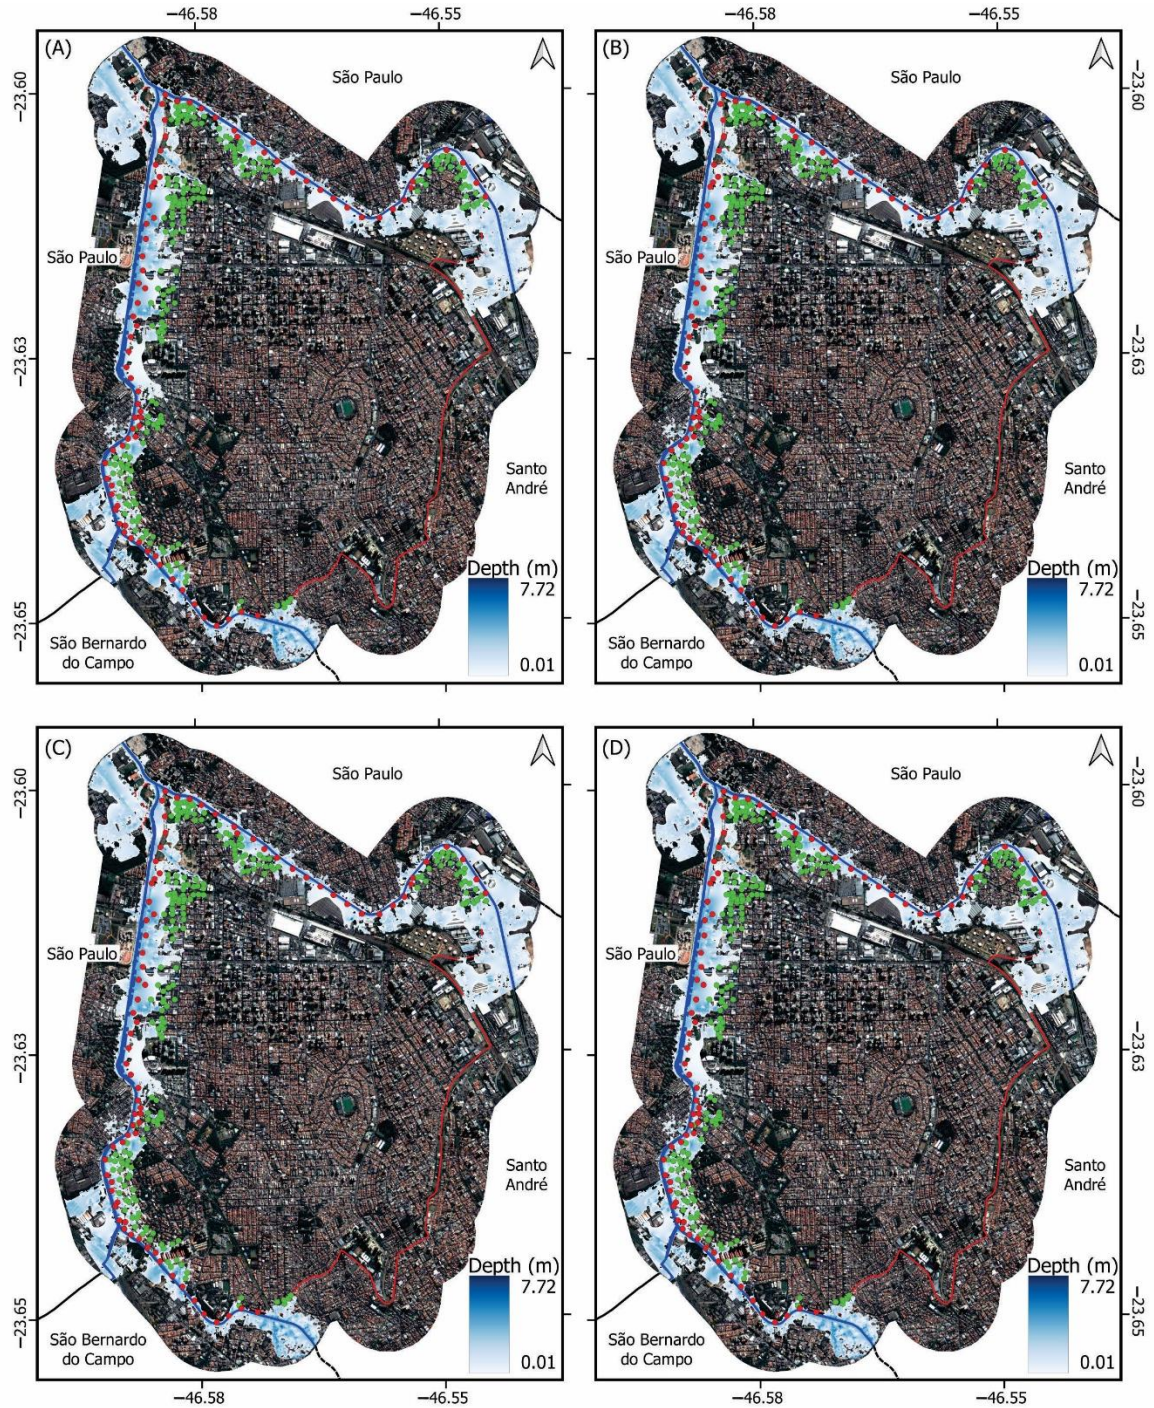

## Map elements

Flooded points

• Validation points

• Other flooded points

Hydrography

■ Open channel

0 0.5 1 1.5 km

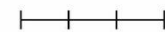

Projection System: UTM

Zone: 23S

DATUM: SIRGAS2000

**Supplementary Figure S1.** Flood maps generated in HEC-RAS using the finer DTM (0.50 cm). (A) represents the simulation with computing interval of 1 s; (B) computing interval of 15 s; (C) computing interval of 30 s; (D) computing interval of 60 s.

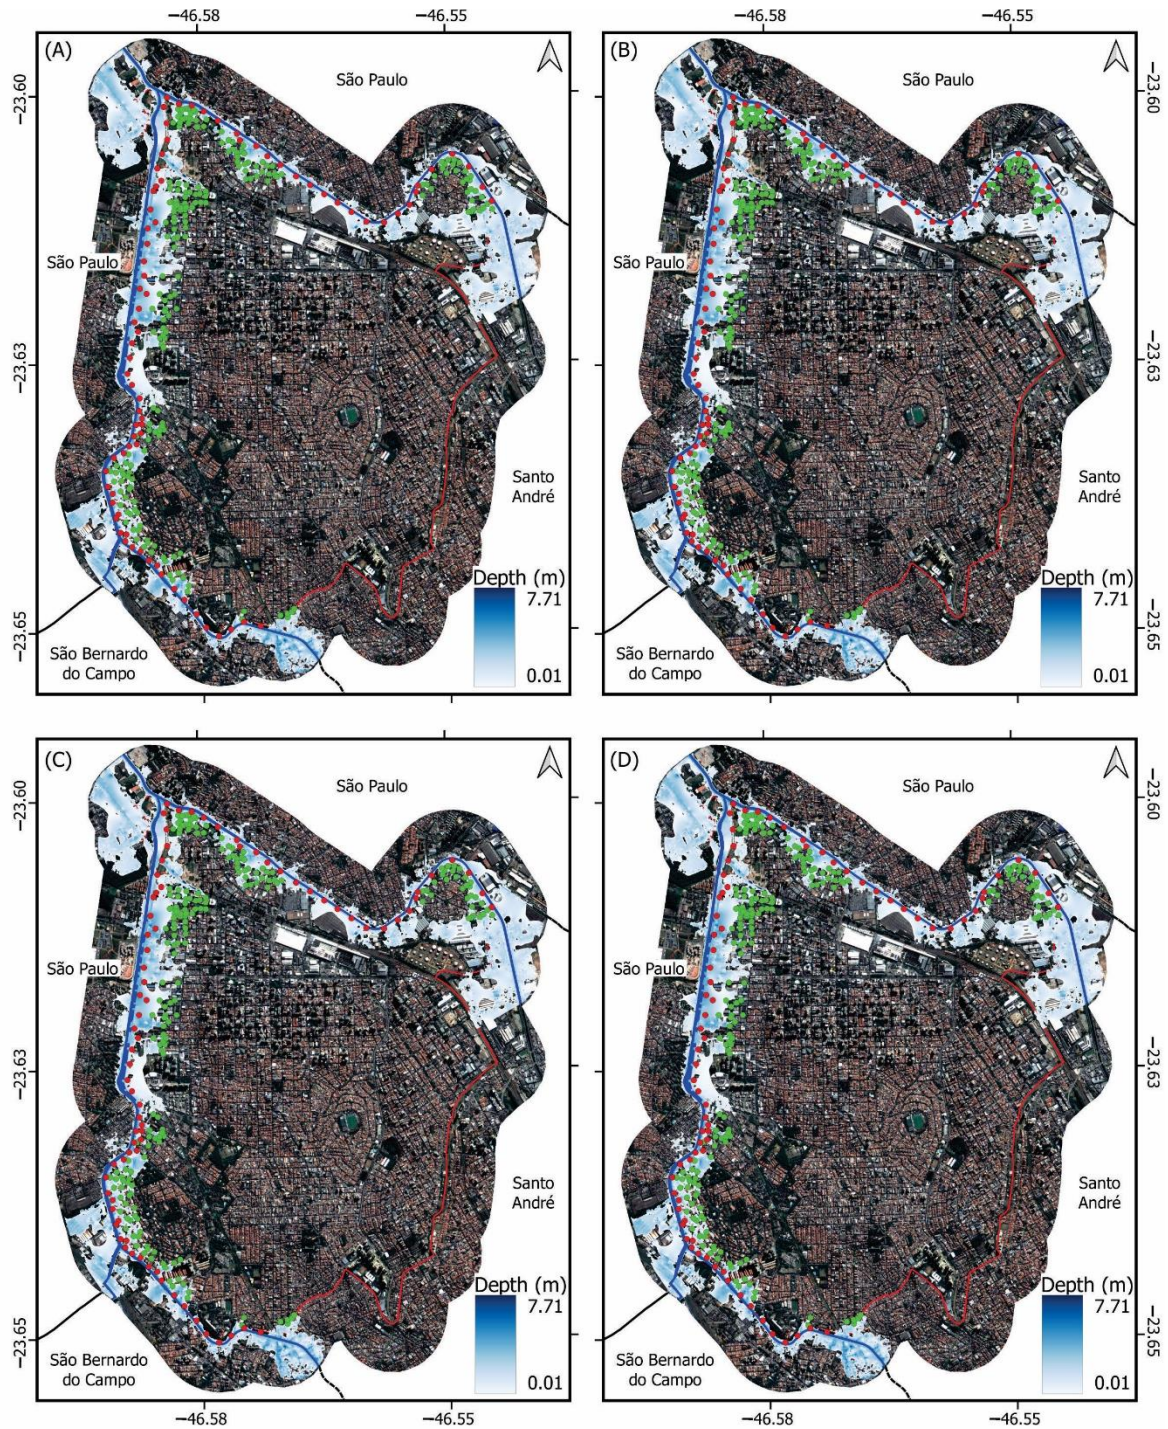

### Map elements

Flooded points

- Validation points
- Other flooded points

Hydrography

■ Open channel

0 0.5 1 1.5 km

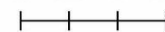

Projection System: UTM

Zone: 23S

DATUM: SIRGAS2000

**Supplementary Figure S2.** Flood maps generated in HEC-RAS using the finer DTM with refined channel mesh (0.50 cm). (A) represents the simulation with computing interval of 1 s; (B) computing interval of 15 s; (C) computing interval of 30 s; (D) computing interval of 60 s.

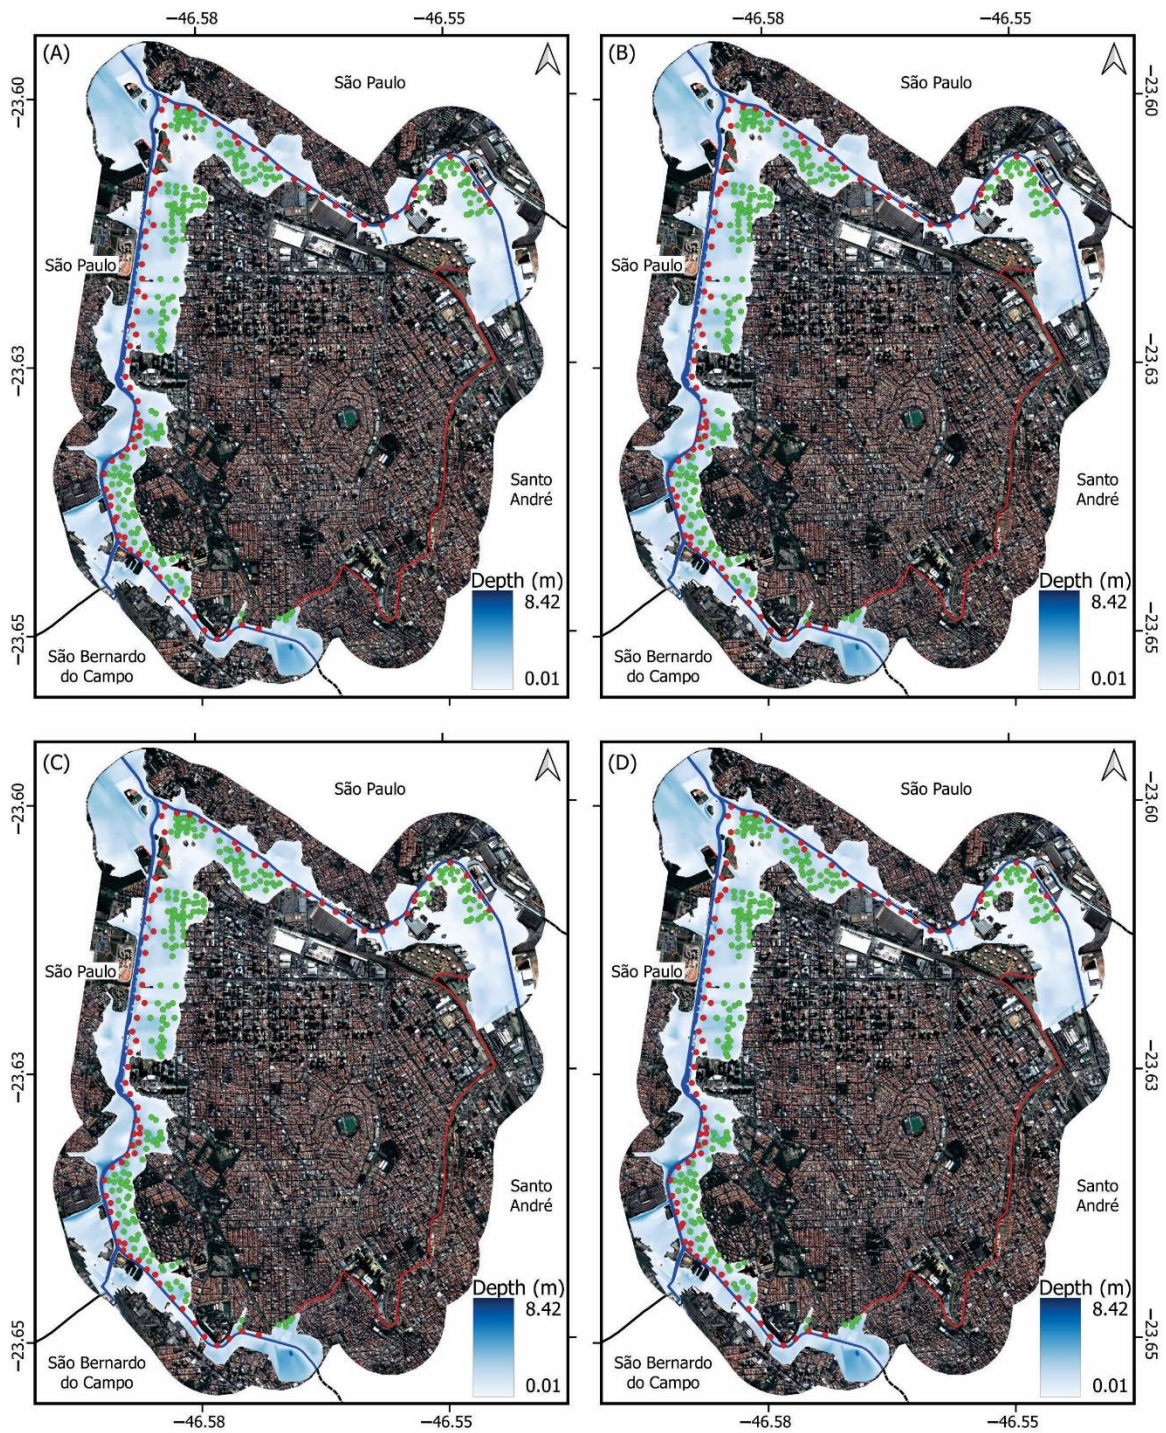

### Map elements

Flooded points

- Validation points
- Other flooded points

Hydrography

Open channel

0 0.5 1 1.5 km

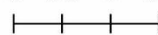

Projection System: UTM

Zone: 23S

DATUM: SIRGAS2000

**Supplementary Figure S3.** Flood maps generated in HEC-RAS using the EMPLASA DTM (5 m). (A) represents the simulation with computing interval of 1 s; (B) computing interval of 15 s; (C) computing interval of 30 s; (D) computing interval of 60 s.

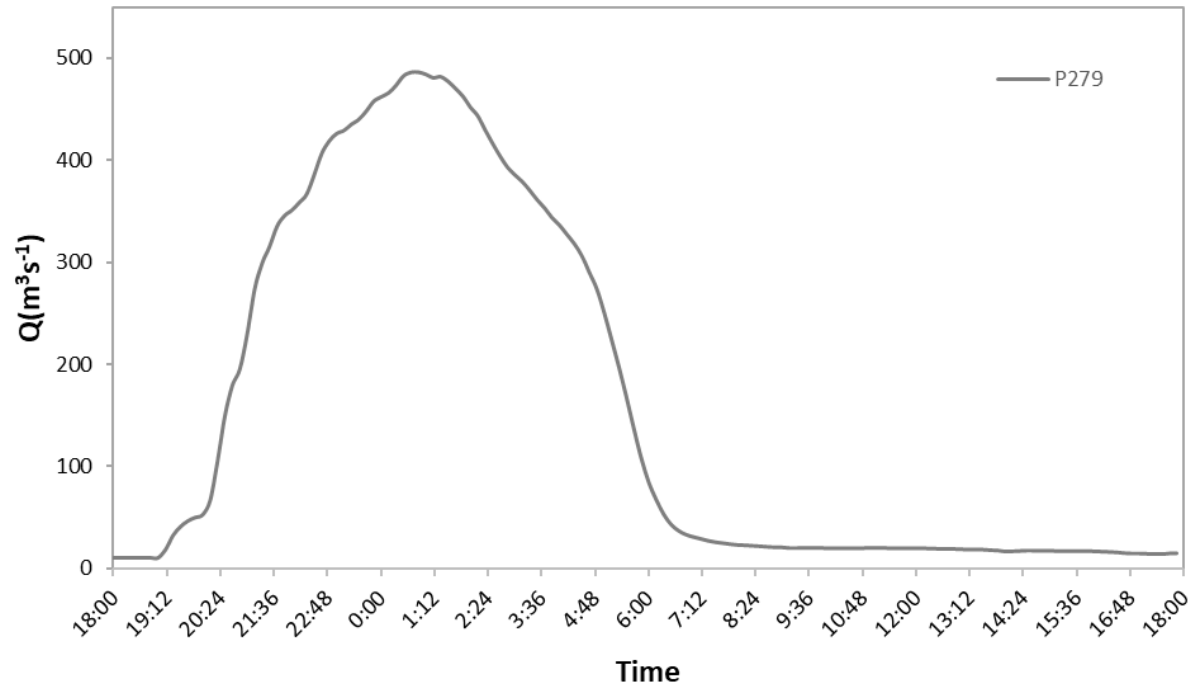

**Supplementary Figure S4.** Hydrograph of the flow rate at the Stream Gauge Station 279 on March 10 of 2019.
